# Supplementary material
Source: publisher site journal article supplement (https://www.spandidos-publications.com/1877/downloadSupplementary)
Supplement: Supplementary file 1 [file downloadSupplementary]

## Sheet: Supplementary table 4
Table SIV. Definitions of gene abbreviations in Figure 6
Gene Symbol	Gene Name
A20	TNF alpha induced protein 3
ACT1	TRAF3 interacting protein 2
ANAPC5	anaphase promoting complex subunit 5
CASP3	caspase 3
CCL11	C-C motif chemokine ligand 11
CCL17	C-C motif chemokine ligand 17
CCL2	C-C motif chemokine ligand 2
CCL20	C-C motif chemokine ligand 20
CCL7	C-C motif chemokine ligand 7
CEBPB	CCAAT enhancer binding protein beta
CHUK	component of inhibitor of nuclear factor kappa B kinase complex
COX2	prostaglandin-endoperoxide synthase 2
CSF2	colony stimulating factor 2
CSF3	colony stimulating factor 3
CXCL1	C-X-C motif chemokine ligand 1
CXCL10	C-X-C motif chemokine ligand 10
CXCL2	C-X-C motif chemokine ligand 2
CXCL5	C-X-C motif chemokine ligand 5
CXCL6	C-X-C motif chemokine ligand 6
CXCL8	C-X-C motif chemokine ligand 8
DEFB4A	defensin beta 4A
ELAVL1	ELAV like RNA binding protein 1
EOTAXIN	C-C motif chemokine ligand 11
ERK	extracellular regulated kinases
FADD	Fas associated via death domain
FOSB	FosB proto-oncogene, AP-1 transcription factor subunit
G-CSF	Granulocyte-Colony Stimulating Factor
GM-CSF	Granulocyte-macrophage colony-stimulating factor
GSK3B	glycogen synthase kinase 3 beta
HSP90AA1	heat shock protein 90 alpha family class A member 1
HUR	ELAV like RNA binding protein 1
IFNG	interferon gamma
IKBA	NFKB inhibitor alpha
IKBKB	inhibitor of nuclear factor kappa B kinase subunit beta
IKBKE	inhibitor of nuclear factor kappa B kinase subunit epsilon
IKBKG	inhibitor of nuclear factor kappa B kinase regulatory subunit gamma
IKKA	inhibitor of nuclear factor kappa B kinase regulatory subunit alpha
IKKB	inhibitor of nuclear factor kappa B kinase regulatory subunit beta
IKKG	inhibitor of nuclear factor kappa B kinase regulatory subunit gamma
IL13	interleukin 13
IL17A	interleukin 17A
IL17B	interleukin 17B
IL17C	interleukin 17C
IL17D	interleukin 17D
IL17F	interleukin 17F
IL17RA	interleukin 17 receptor A
IL17RB	interleukin 17 receptor B
IL17RC	interleukin 17 receptor C
IL17RE	interleukin 17 receptor E
IL1B	interleukin 1 beta
IL25	interleukin 25
IL4	interleukin 4
IL5	interleukin 5
IL6	interleukin 6
LCN2	lipocalin 2
MAP3K7	mitogen-activated protein kinase kinase kinase 7
MAPK1	mitogen-activated protein kinase 1
MAPK14	mitogen-activated protein kinase 14
MMP1	matrix metallopeptidase 1
MMP13	matrix metallopeptidase 13
MMP3	matrix metallopeptidase 3
MMP9	matrix metallopeptidase 9
MUC5AC	mucin 5AC, oligomeric mucus/gel-forming
MUC5B	mucin 5B, oligomeric mucus/gel-forming
NFKB1	nuclear factor kappa B subunit 1
NFKBIA	NFKB inhibitor alpha
PTGS2	prostaglandin-endoperoxide synthase 2
S100A7	S100 calcium binding protein A7
S100A8	S100 calcium binding protein A8
S100A9	S100 calcium binding protein A9
SF2	serine and arginine rich splicing factor 1
SRSF1	serine and arginine rich splicing factor 1
TAB2	TGF-beta activated kinase 1 (MAP3K7) binding protein 2
TAB3	TGF-beta activated kinase 1 (MAP3K7) binding protein 3
TAK1	mitogen-activated protein kinase kinase kinase 7
TARC	C-C motif chemokine ligand 17
TBK1	TANK binding kinase 1
TNF	tumor necrosis factor
TNFAIP3	TNF alpha induced protein 3
TRADD	TNFRSF1A associated via death domain
TRAF2	TNF receptor associated factor 2
TRAF3	TNF receptor associated factor 3
TRAF3IP2	TRAF3 interacting protein 2
TRAF4	TNF receptor associated factor 4
TRAF5	TNF receptor associated factor 5
TRAF6	TNF receptor associated factor 6
USP25	ubiquitin specific peptidase 25
